# Supplementary material for: Bi-Allelic Novel Variants in CLIC5 Identified in a Cameroonian Multiplex Family with Non-Syndromic Hearing Impairment
Source: Genes (Basel). 2020 Oct 23;11(11):1249. doi: 10.3390/genes11111249 (PMC7690789; doi:10.3390/genes11111249)
Supplement: Supplementary file 1 [file genes-11-01249-s001.pdf]

## SUPPLEMENTARY MATERIALS

### Bi-allelic Novel Variants in *CLIC5* Identified in a Cameroonian Multiplex Family with Non-syndromic Hearing Impairment.

Edmond Wonkam-Tingang, Isabelle Schrauwen, Kevin K. Esoh, Thashi Bharadwaj, Liz M. Nouel-Saied, Anushree Acharya, Abdul Nasir, Samuel M. Adadey, Shaheen Mowla, Suzanne M Leal and Ambroise Wonkam

**Table S1:** Demographic and clinical characteristics of isolated NSHI cases screened for the identified *CLIC5* pathogenic variants. Mean age = 10.92 ± 4.84 (3 – 31) years.

| Categories                                 | n/N     | Frequency (%) |
|--------------------------------------------|---------|---------------|
| <b>Age range (years)</b>                   |         |               |
| <10                                        | 51/118  | 43.22         |
| 10 – 20                                    | 61/118  | 51.69         |
| >20                                        | 6/118   | 5.08          |
| <b>Gender</b>                              |         |               |
| Male                                       | 63/118  | 53.39         |
| Female                                     | 55/118  | 46.61         |
| <b>Ethnic group</b>                        |         |               |
| Bamileke (Semi-bantu)                      | 49/118  | 41.53         |
| Beti-fang (Bantu)                          | 34/118  | 28.81         |
| Bassa (Bantu)                              | 11/118  | 9.32          |
| Bamun (Semi-bantu)                         | 9/118   | 7.63          |
| Duala (Bantu)                              | 7/118   | 5.93          |
| Fulani (Sudanese)                          | 4/118   | 3.39          |
| Tikar (Semi-bantu)                         | 3/118   | 2.54          |
| Mbo (Bantu)                                | 1/118   | 0.85          |
| <b>Age of onset</b>                        |         |               |
| Congenital/Prelingual (before 2 years old) | 107/118 | 90.68         |
| Perilingual (between 2 and 4 years)        | 9/118   | 7.63          |
| Postlingual (after 4 years)                | 2/118   | 1.69          |
| <b>Degree of hearing impairment</b>        |         |               |
| Moderate II                                | 1/65    | 1.54          |
| Severe I                                   | 4/65    | 6.15          |
| Severe II                                  | 4/65    | 6.15          |
| Profound I                                 | 14/65   | 21.54         |
| Profound II                                | 19/65   | 29.23         |
| Profound III                               | 12/65   | 18.46         |
| Total                                      | 11/65   | 16.92         |
| <b>Type of hearing impairment</b>          |         |               |
| Sensorineural                              | 58/65   | 89.23         |
| Mixed                                      | 7/65    | 10.77         |
| Bilateral                                  | 65/65   | 100.00        |

**Table S2:** Description of pathogenic variants identified in *CLIC5*

|                     | c.224T>C [p.(L75P)] | c.63+1G>A       |
|---------------------|---------------------|-----------------|
| Predicted effect    | Missense            | Splicing        |
| Frequency in gnomAD | Absent              | Absent          |
| Frequency in UK10K  | Absent              | Absent          |
| Frequency in GME    | Absent              | Absent          |
| dbSNP rs number     | Absent              | Absent          |
| GERP                | 5.73                | 4.72            |
| PhyloP              | 9.29                | 4.49            |
| PhastCons           | 1                   | 1               |
| SiPhy               | 15.30               | 12.06           |
| SIFT                | Damaging            | NA              |
| Polyphen2 HDIV      | Probably damaging   | NA              |
| Polyphen2 HVAR      | Probably damaging   | NA              |
| MutationAssessor    | High                | NA              |
| LRT                 | Deleterious         | NA              |
| M-CAP               | Damaging            | NA              |
| REVEL               | Pathogenic          | NA              |
| MutPred             | Pathogenic          | NA              |
| PROVEAN             | Damaging            | NA              |
| MetaSVM             | Damaging            | NA              |
| MetaLR              | Tolerated           | NA              |
| MutationTaster      | Disease causing     | Disease causing |
| Eigen               | Pathogenic          | Benign          |
| Eigen-PC            | Pathogenic          | Pathogenic      |
| FATHMM-MKL          | Damaging            | Damaging        |
| CADD                | 32                  | 20.9            |
| DANN                | 0.999               | 0.987           |
| ACMG classification | Pathogenic          | Pathogenic      |

NA, not applicable. RefSeq transcript used: NM\_016929.5

### Other variants that co-segregate with the hearing impairment within “Family 24”

Apart from *CLIC5*, only *CEP250* gene shows compound synonymous variants (i.e. NM\_007186.5:c.1380T>C and NM\_007186.5:c.1935C>T; Table S3) that co-segregate with hearing impairment, and was unlikely the cause of the disease. None of these synonymous variants is predicted to alter the splicing of the pre-mRNA. No homozygous variants segregate with the hearing impairment phenotype.

**Table S3:** Synonymous likely benign variants identified in *CEP250* gene

|                         | c.1380T>C [p.( S460S)] | c.1935C>T [p.( V645V)] |
|-------------------------|------------------------|------------------------|
| Predicted effect        | Synonymous             | Synonymous             |
| Frequency in gnomAD     | 0.0003                 | 0.0005                 |
| Frequency in gnomAD_Afr | 0.0009                 | 0.0002                 |
| Frequency in GME        | Absent                 | Absent                 |
| dbSNP rs number         | rs142139756            | rs370009858            |
| ACMG classification     | Likely benign          | Likely benign          |

RefSeq used: NM\_007186.5

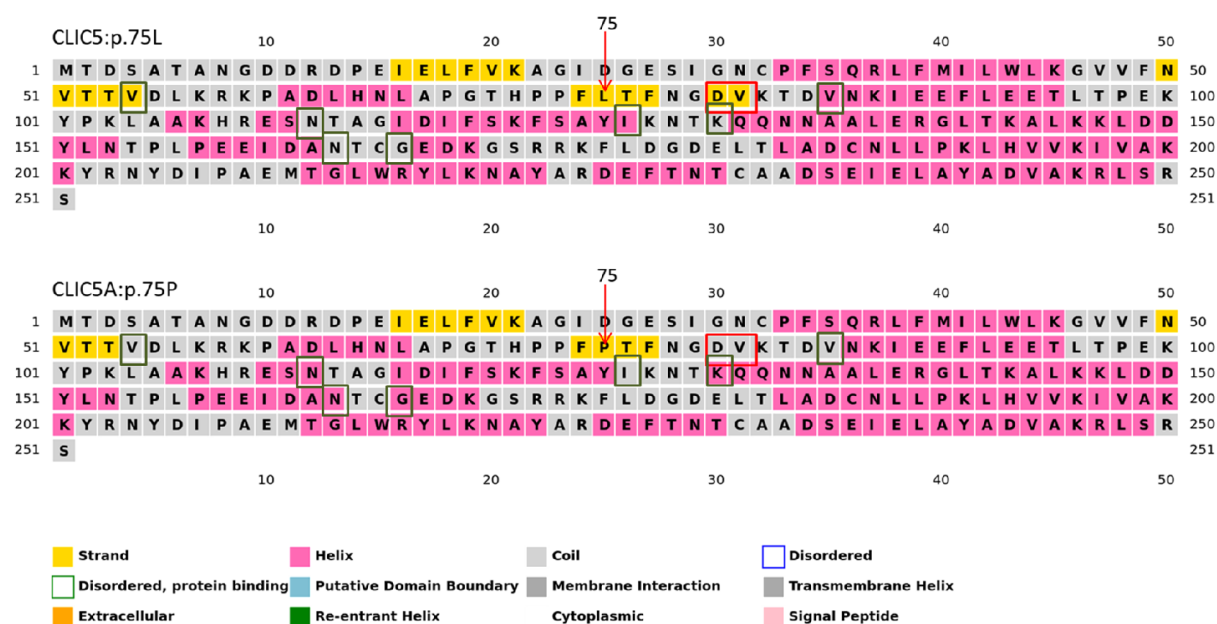

**Figure S1:** Secondary structure prediction of CLIC5 using the 251 amino acids isoform (NM\_016929.5). Boxes indicate positions of difference between wild type (CLIC5A:p.75L) and mutant (CLIC5A:p.75P). Red boxes show loss of the fourth strand in the wild type while black boxes show changes in the lengths of strands and helices

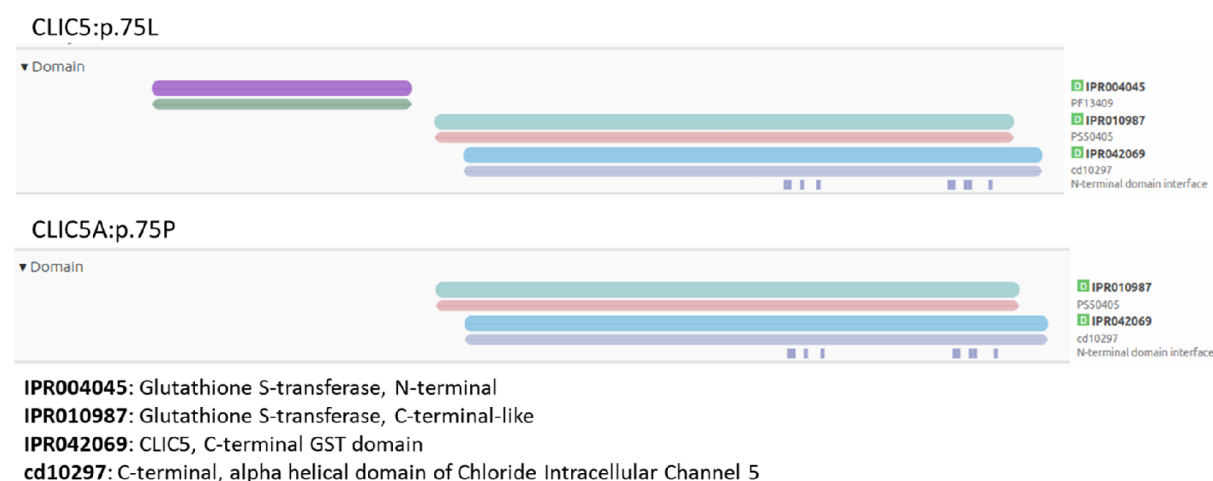

**Figure S2:** Domains of CLIC5A:p.75L (wild type) and CLIC5A:p.75P (mutant) predicted by InterPro, based on the 251 amino acids isoform (NM\_016929.5). The GST N-terminal domain is lost in the mutant and its protein-binding activity is abolished.

## **CLIC5 physicochemical properties**

Using ProtParam of the ExPASy Bioinformatics Resource Portal, CLIC5 wild type and mutant proteins were predicted to have similar physicochemical properties as expected including; pI (5.70), molecular weight (MW = 28.2kDa) and extinction coefficients. However, they differed on instability classification. While the wild type protein was classified as stable (stability index = 39.34), the mutant protein was classified as unstable (stability index = 40.11). This was consistent with the I-MutantSuite (I-Mutant3.0) result which predicted the variant to impose a “Large Decrease” in protein stability.

## **CLIC5 Protein structure determination and analysis**

Given the predicted secondary structural changes, it is conceivable that there would be a three dimensional (3D) structural change of the protein due to the mutation. Considering that the structure of CLIC5A has been recently solved (PDB: 6Y2H), we used a single template-based approach, utilizing this structure as template to model the structures of the wild type and mutant (CLIC5:pL75P) proteins. 6Y2H is a 236 amino acid (CLIC5A residues 16 - 251) X-ray crystallographic monomeric structure resolved to 2.15 angstroms with zero (0) Ramachandran outliers.

As expected, the global model quality estimation (GMQE) for the wild type (0.93) and mutant (0.93) models were comparable to the experimentally-determined structure (0.96; on a scale of 0 – 1) (Table S4). The model quality was generally better for the wild type as compared to the mutant, while both models received Swiss-Model “thumbs up” for QMEANs indicating high quality. Following refinement, a considerable increase in the quality of the models was achieved as was apparent by zero Ramachandran outliers and poor rotamers, lower MolProbity and clash scores, and high Ramachandran favored and favored rotamer scores. The relatively lower Galaxy energy for the wild type model indicates a higher stability as compared to the mutant model, consistent with earlier findings.

**Table S4:** Model parameters before and after refinement showing improvement in model qualities

| Parameter                            | Before Refinement       |                         | After Refinement        |                         |
|--------------------------------------|-------------------------|-------------------------|-------------------------|-------------------------|
|                                      | CLIC5A:p.75L            | CLIC5A:p.75P            | CLIC5A:p.75L            | CLIC5A:p.75P            |
| Galaxy energy                        | -                       | -                       | -6489.70                | -6409.60                |
| GMQE (0-1)                           | 0.93                    | 0.93                    | -                       | -                       |
| QMEAN (Goal: 0)                      | -1.45 (abs 1.45)        | -1.53 (abs 1.53)        | -                       | -                       |
| MolProbity (smaller is better)       | 0.85 (100th percentile) | 1.02 (100th percentile) | 0.50 (100th percentile) | 0.75 (100th percentile) |
| Clash score (Goal: 0)                | 1.07 (99th percentile)  | 1.61 (99th percentile)  | 0 (100th percentile)    | 0.81 (99th percentile)  |
| Ramachandran favored (Goal: >98%)    | 97.84%                  | 97.41%                  | 99.57%                  | 98.28%                  |
| Poor rotamers (<0.3%)                | 0.50%                   | 0.50%                   | 0.00%                   | 0.00%                   |
| Favored rotamers (>98%)              | 91.54%                  | 92.04%                  | 100%                    | 99.50%                  |
| Ramachandran outliers (Goal: <0.05%) | 0.43% (1)               | 0.86% (2)               | 0.00%                   | 0.00%                   |
| Rama distribution Z-score (Goal: <2) | 1.25 ± 0.53             | 1.22 ± 0.53             | 0.23 ± 0.50             | 0.31 ± 0.51             |
| C-beta deviations (Goal: 0)          | 4                       | 3                       | 1                       | 0                       |
| Bad bonds (Goal: 0%)                 | 0.16%                   | 0.16%                   | 0.00%                   | 0.00%                   |
| Bad angles (Goal: <0.1%)             | 0.90%                   | 0.97%                   | 0.47%                   | 0.35%                   |

GMQE, global model quality estimation; QMEAN, qualitative model energy analysis
